## Clinical significance of Q waves in ischemic cardiomyopathy

Rodenas Alesina E.<sup>1</sup>; Jordan P.<sup>2</sup>; Herrador L.<sup>2</sup>; Espinet-Coll C.<sup>2</sup>; Pizzi N.<sup>2</sup>; Aguade-Bruix S.<sup>2</sup>; Ferreira-Gonzalez I.<sup>2</sup>

<sup>1</sup>University Hospital Vall d'Hebron, Barcelona, Spain

<sup>2</sup>University Hospital Vall d'Hebron, Cardiology, Barcelona, Spain

**Funding Acknowledgements:** Type of funding sources: Public hospital(s). Main funding source(s): CIBER-CV

**AIMS:** The scintigraphic translation of Q waves in patients with ischemic cardiomyopathy and LVEF < 40% has not yet been assessed. The aim of this study was to explore the relationship between Q waves and necrotic tissue and to analyze their impact in prognosis.

**METHODS AND RESULTS:** A retrospective study enrolling 487 consecutive patients (67,0 [57,4 – 75,4] years), with ischemic cardiomyopathy, LVEF <40% and narrow QRS who underwent stress-rest SPECT was conducted. Patients with Q waves (320 patients [65,7%]) had less comorbidity and ischemia, but more necrosis. Q waves correlated poorly with lack of viability (AUC = 0,63) and were independently associated with the subendocardial extent of the necrosis. After a follow-up of 5,07 years, the primary outcome (cardiovascular death, heart failure hospitalization or myocardial infarction) occurred in 192 (39,4%) patients, without differences between groups in multivariate analysis. After accounting for non-cardiovascular death as a competitive risk, the interaction between >10% of ischemia and revascularization remained in Cox model both in the total cohort (aHR= 0,46 [0,24 – 0,86]), and in patients with Q waves (aHR = 0,27 [0,11–0,69]).

**CONCLUSION:** Patients with ischemic cardiomyopathy with Q waves have larger subendocardial scarring and more transmural necrosis, although correlation between Q waves and transmural scarring is poor. Revascularization if >10% ischemia is present is associated with a better prognosis. Ischemia burden should be assessed and accordingly treated in these patients, and no differences in management should be made in the presence of Q waves.

Table 1. Cox proportional hazards model

|                                  | Total cohort (N = 471) |         |             | Patients with Q waves (N = 315) |         |             |
|----------------------------------|------------------------|---------|-------------|---------------------------------|---------|-------------|
|                                  | aHR                    | p-value | 95% CI      | aHR                             | p-value | 95% CI      |
| Age (per year)                   | 1,02                   | 0,007   | 1,01 - 1,04 |                                 | n.s.    |             |
| Diabetes mellitus                | 1,35                   | 0,047   | 1,00 - 1,81 | 1,54                            | 0,016   | 1,09 - 2,20 |
| eGFR < 60 ml/min                 | 1,59                   | 0,005   | 1,15 - 2,21 | 1,96                            | <0,001  | 1,36 - 2,82 |
| Previous HF hospitalization      | 1,71                   | 0,002   | 1,23 - 2,38 | 1,76                            | 0,007   | 1,17 - 2,64 |
| Previous PCI                     | 1,32                   | 0,069   | 0,98 - 1,78 |                                 | n.s.    |             |
| Previous CABG                    |                        | n.s.    |             | 1,77                            | 0,009   | 1,15 - 2,72 |
| Angina or dyspnea                | 1,68                   | 0,001   | 1,24 - 2,28 | 1,71                            | 0,004   | 1,19 - 2,46 |
| Indexed TDV (per quartile)       | 1,16                   | 0,047   | 1,02 - 1,33 |                                 | n.s.    |             |
| Revascularization*ischemia > 10% | 0,46                   | 0,015   | 0,24 - 0,86 | 0,27                            | 0,006   | 0,11 - 0,69 |

Cox regression for the primary endpoint (cardiovascular death, heart failure hospitalization or myocardial infarction), accounting for non-cardiovascular death as a competitive risk.

Abstract Figure. Survival for the primary endpoint

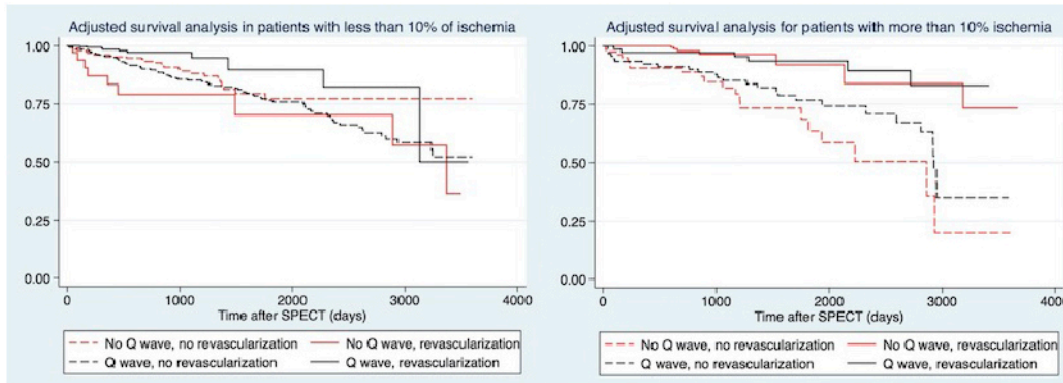

Source: http://academic.oup.com/ehjcimaging/article-pdf/22/Supplement_1/jeaa356.340/36215347/jeaa356.340.pdf
